# Supplementary material for: Non-Invasive Molecular Survey of Sarcoptic Mange in Wildlife: Diagnostic Performance in Wolf Faecal Samples Evaluated by Multi-Event Capture–Recapture Models
Source: MDPI journal article supplement (doi:10.3390/pathogens10020243), 2021-02-20
Supplement: s1 [file s1]

## Supplementary materials

### Non-invasive molecular survey of sarcoptic mange in wildlife: diagnostic performance in wolf faecal samples evaluated by multievent capture-recapture models

Julieta Rousseau, Mónica Nakamura, Helena Rio-Maior, Francisco Álvares, Rémi Choquet, Luís Madeira de Carvalho, Raquel Godinho, Nuno Santos

#### File S1. Methodological approach for multievent capture-recapture model

Assuming the initial state vector  $IS$ , the survival matrix  $S$ , the transition matrix  $T$ , the detection matrix  $D$ , the test matrix  $M$  and the event matrix  $B$  [1]. If  $\pi$  denotes the proportion of newly marked individuals in the state M+ and  $1-\pi$  in state M-,  $\varphi$  the probability that an individual survives from  $t$  to  $t+1$ ,  $\psi$  the probability that it changes state,  $p$  the detection probability of an individual,  $m$  the probability that an individual sample is tested for the presence of *S. scabiei* DNA and  $b$  the probability that it is assigned a given observation:

|       |    |        |        |          |
|-------|----|--------|--------|----------|
| $S =$ |    | M+     | M-     | D        |
|       | M+ | $\Phi$ | 0      | $1-\Phi$ |
|       | M- | 0      | $\Phi$ | $1-\Phi$ |
|       | D  | 0      | 0      | 1        |

|       |    |          |          |   |
|-------|----|----------|----------|---|
| $T =$ |    | M+       | M-       | D |
|       | M+ | $1-\psi$ | $\psi$   | 0 |
|       | M- | $\psi$   | $1-\psi$ | 0 |
|       | D  | 0        | 0        | 1 |

|       |    |       |     |     |
|-------|----|-------|-----|-----|
|       |    | ND    | M+  | M-  |
| $D =$ | M+ | $1-p$ | $p$ | 0   |
|       | M- | $1-p$ | 0   | $p$ |
|       | D  | 1     | 0   | 0   |

|       |    |    |             |             |            |
|-------|----|----|-------------|-------------|------------|
|       |    | ND | M+ tested   | M- tested   | Not tested |
| $M =$ | ND | 1  | 0           | 0           | 0          |
|       | M+ | 0  | $1-m^{(a)}$ | 0           | $m^{(a)}$  |
|       | M- | 0  | 0           | $1-m^{(a)}$ | $m^{(a)}$  |

|       |            |   |             |           |   |
|-------|------------|---|-------------|-----------|---|
|       |            | 0 | 1           | 2         | 3 |
| $B =$ | ND         | 1 | 0           | 0         | 0 |
|       | M+ tested  | 0 | $1-b$       | $b$       | 0 |
|       | M- tested  | 0 | $1-b^{(b)}$ | $b^{(b)}$ | 0 |
|       | Not tested | 0 | 0           | 0         | 1 |

Fixed values in the most supported model:

<sup>(a)</sup>  $m=0.247$  (the proportion of samples not tested for mange)

<sup>(b)</sup>  $b=0$

## References:

1. Pradel, R. Multievent: an extension of multistate capture-recapture models to uncertain states. *Biometrics* **2005**, *61*, 442–447, doi:10.1111/j.1541-0420.2005.00318.x.

**Table S1. Parametrizations of the most supported model and models with  $\Delta AICc < 4$ .** Differences to the most supported model highlighted in bold.

| Model parametrization |                                                                  |                                                                                             |           |                                   |                               | nP | Deviance | AICc     | $\Delta AICc$ |
|-----------------------|------------------------------------------------------------------|---------------------------------------------------------------------------------------------|-----------|-----------------------------------|-------------------------------|----|----------|----------|---------------|
| #                     | Survival                                                         | Transition between states                                                                   | Detection | Test for mange                    | State assignment              |    |          |          |               |
| 1                     | Age 1: constant<br>Age 2: constant                               | Prob. M+ to M- constant<br>Prob. M- to M+ temporal<br>covariate seroprevalence<br>same year | Constant  | Prob. not being<br>tested = 0.247 | Prob. M- test<br>positive = 0 | 8  | 1,099.02 | 1,115.46 | 0             |
| 2                     | Age 1: constant<br><b>Age 2: mange<br/>effect</b>                | Prob. M+ to M- constant<br>Prob. M- to M+ temporal<br>covariate seroprevalence<br>same year | Constant  | Prob. not being<br>tested = 0.247 | Prob. M- test<br>positive = 0 | 9  | 1,097.84 | 1,116.40 | 0.94          |
| 3                     | Age 1: constant<br><b>Age 2: mange and<br/>sex effect</b>        | Prob. M+ to M- constant<br>Prob. M- to M+ temporal<br>covariate seroprevalence<br>same year | Constant  | Prob. not being<br>tested = 0.247 | Prob. M- test<br>positive = 0 | 10 | 1,096.80 | 1,117.48 | 2.02          |
| 4                     | Age 1: constant<br>Age 2: constant                               | Prob. M+ to M- constant<br>Prob. M- to M+ temporal<br>covariate seroprevalence<br>same year | Constant  | Prob. not being<br>tested = 0.247 | <b>No constraints</b>         | 9  | 1,099.02 | 1,117.57 | 2.11          |
| 5                     | <b>Age 1: mange<br/>effect</b><br><b>Age 2: mange<br/>effect</b> | Prob. M+ to M- constant<br>Prob. M- to M+ temporal<br>covariate seroprevalence<br>same year | Constant  | Prob. not being<br>tested = 0.247 | Prob. M- test<br>positive = 0 | 10 | 1,097.84 | 1,118.52 | 3.06          |

nP, number of estimable parameters;  $\Delta AICc$ , difference between the AICc of the current model and that of the most supported model
